# Supplementary material for: Enhancement of Methane Catalysis Rates in Methylosinus trichosporium OB3b
Source: MDPI journal article supplement (doi:10.3390/biom12040560), 2022-04-09
Supplement: s1 [file s1]

**Table S1(a):** Percentage Identity table of *pmoA* from six methanotrophs used to analyze the conserved residues of the pocket sites.

| UNIPROT ID | D5MJE0 | A9QPE3 | W6DH29 | Q50541 | Q607G3 | G4SZ63 |
|------------|--------|--------|--------|--------|--------|--------|
| D5MJE0     | 100.00 | 49.17  | 49.17  | 47.11  | 53.72  | 50.83  |
| A9QPE3     | 49.17  | 100.00 | 49.80  | 50.20  | 51.42  | 56.68  |
| W6DH29     | 49.17  | 49.80  | 100.00 | 86.51  | 57.89  | 60.32  |
| Q50541     | 47.11  | 50.20  | 86.51  | 100.00 | 58.70  | 59.51  |
| Q607G3     | 53.72  | 51.42  | 57.89  | 58.70  | 100.00 | 78.14  |
| G4SZ63     | 50.83  | 56.68  | 60.32  | 59.51  | 78.14  | 100.00 |

**Table S1(b):** Percentage Identity table of *pmoB* from six methanotrophs used to analyze the conserved residues of the pocket sites.

| UNIPROT ID | A9QPE4 | D5MJE0 | W6D960 | Q9KX50 | G1UBD1 | G4SZ64 |
|------------|--------|--------|--------|--------|--------|--------|
| A9QPE4     | 100.00 | 38.23  | 34.32  | 33.33  | 36.86  | 36.36  |
| D5MJE0     | 38.23  | 100.00 | 35.96  | 36.12  | 41.56  | 38.54  |
| W6D960     | 34.32  | 35.96  | 100.00 | 80.43  | 46.57  | 43.87  |
| Q9KX50     | 33.33  | 36.12  | 80.43  | 100.00 | 45.52  | 44.31  |
| G1UBD1     | 36.86  | 41.56  | 46.57  | 45.52  | 100.00 | 71.74  |
| G4SZ64     | 36.36  | 38.54  | 43.87  | 44.31  | 71.74  | 100.00 |

**Table S1(c):** Percentage Identity table of *pmoC* from six methanotrophs used to analyze the conserved residues of the pocket sites.

| UNIPROT ID | D5MIN0 | A9QPE2 | Q9KX51 | W6D653 | Q603F1 | G4SZ62 |
|------------|--------|--------|--------|--------|--------|--------|
|------------|--------|--------|--------|--------|--------|--------|

|               |        |        |        |        |        |        |
|---------------|--------|--------|--------|--------|--------|--------|
| <b>D5MIN0</b> | 100.00 | 51.37  | 49.00  | 50.60  | 48.43  | 47.60  |
| <b>A9QPE2</b> | 51.37  | 100.00 | 53.33  | 51.76  | 50.77  | 49.80  |
| <b>Q9KX51</b> | 49.00  | 53.33  | 100.00 | 86.33  | 59.84  | 58.30  |
| <b>W6D653</b> | 50.60  | 51.76  | 86.33  | 100.00 | 60.24  | 59.11  |
| <b>Q603F1</b> | 48.43  | 50.77  | 59.84  | 60.24  | 100.00 | 72.69  |
| <b>G4SZ62</b> | 47.60  | 49.80  | 58.30  | 59.11  | 72.69  | 100.00 |
